# Supplementary material for: Air pollution satellite-based CO 2 emission inversion: system evaluation, sensitivity analysis, and future perspective
Source: Copernicus journal article supplement (doi:10.5194/egusphere-2024-1986), 2024-08-01
Supplement: Supplementary file 1 [file egusphere-2024-1986-supplement.pdf]

1 Supplement Materials for

2 **Air pollution satellite-based CO<sub>2</sub> emission inversion: system**  
3 **evaluation, sensitivity analysis, and future perspective**

4 Hui Li<sup>1,2</sup>, Jiabin Qiu<sup>1,2</sup>, Bo Zheng<sup>1,2,\*</sup>

5 <sup>1</sup>Shenzhen Key Laboratory of Ecological Remediation and Carbon Sequestration, Institute of Environment  
6 and Ecology, Tsinghua Shenzhen International Graduate School, Tsinghua University, Shenzhen 518055,  
7 China.

8 <sup>2</sup>State Environmental Protection Key Laboratory of Sources and Control of Air Pollution Complex, Beijing  
9 100084, China.

10 *Correspondence to:* Bo Zheng (bozheng@sz.tsinghua.edu.cn)

11 **This PDF file includes:**

- 12 ➤ Texts S1 to S2  
13 ➤ Figures S1 to S15

14 **Text S1. Tests affecting NO<sub>x</sub> and CO<sub>2</sub> emissions result in similar impacts**

15 Among tests, Res\_2×2.5 and 2021\_base are the most influential ones, triggering  $\overline{RC}_t \pm 1\sigma_t$   
16 of -2.8%±6.2% (-1.2%±6.0%) and 0.5%±8.6% (-0.6%±6.9%) in daily national total NO<sub>x</sub>  
17 (CO<sub>2</sub>) emissions, respectively. Trop\_fill and Trop\_v2.3 come next, causing variations of  
18 1.1%±5.3% (1.3%±3.9%) and -0.5%±6.7% (-0.4%±5.9%) in daily national total NO<sub>x</sub> (CO<sub>2</sub>)  
19 emissions. In contrast,  $\beta_{[-20\%, 20\%]}$  leads to notable but consistent variations in NO<sub>x</sub> and  
20 CO<sub>2</sub>, linearly strengthening its impact as the adjustment amplitude increases, wherein  $\beta_{-20\%}$   
21 triggers 3.0%±3.2% in NO<sub>x</sub> emissions and 2.6%±3.0% in CO<sub>2</sub> emissions (Fig. S5).

22

23 **Text S2. Response of sectoral NO<sub>x</sub> emissions to tests**

24 The residential sector is the most vulnerable to 2021\_base, with variations up to -6.0%±6.7%  
25 in daily NO<sub>x</sub> emissions. Residential emissions exclusively present sensitivity to 4\_sectors,  
26 thre\_04, and thre\_06, with variations of -6.1%±2.5%, 7.4%±7.8%, and -6.4%±5.6% in its  
27 NO<sub>x</sub> emissions, respectively. The industry and transport emissions are more sensitive to  
28 the  $\beta_{[-20\%, 20\%]}$ , with  $\overline{RC}_s \pm 1\sigma_s$  up to 4.1%±4.5% and 4.5%±6.1% in NO<sub>x</sub> emissions  
29 under  $\beta_{-20\%}$ . Res\_2×2.5 incurs the  $\overline{RC}_s \pm 1\sigma_s$  of -8.3%±12.4% and -2.7%±8.8% in daily  
30 national NO<sub>x</sub> emissions in transport and power sectors, respectively.

31

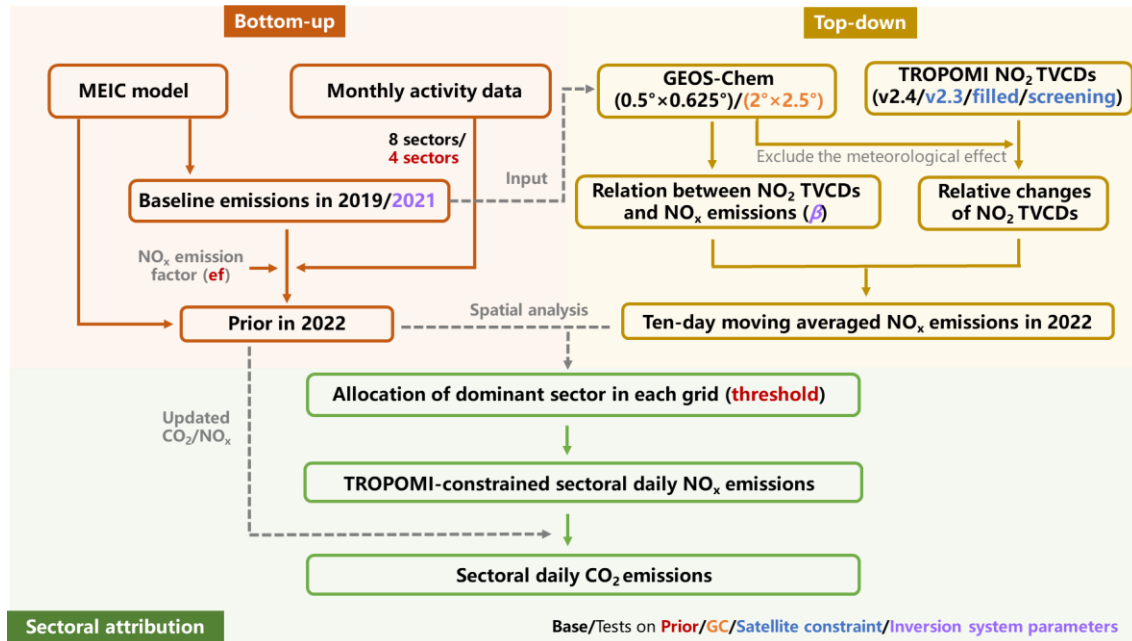

32

33 **Figure S1. The methodology of inversion system and the tests we introduced.**  
 34 Sensitivity tests include prior (red labeled), model resolution (orange labeled), satellite data  
 35 (blue labeled), and inversion system parameters (purple labeled). Detailed settings are seen  
 36 in Tables 1 and 2.

37

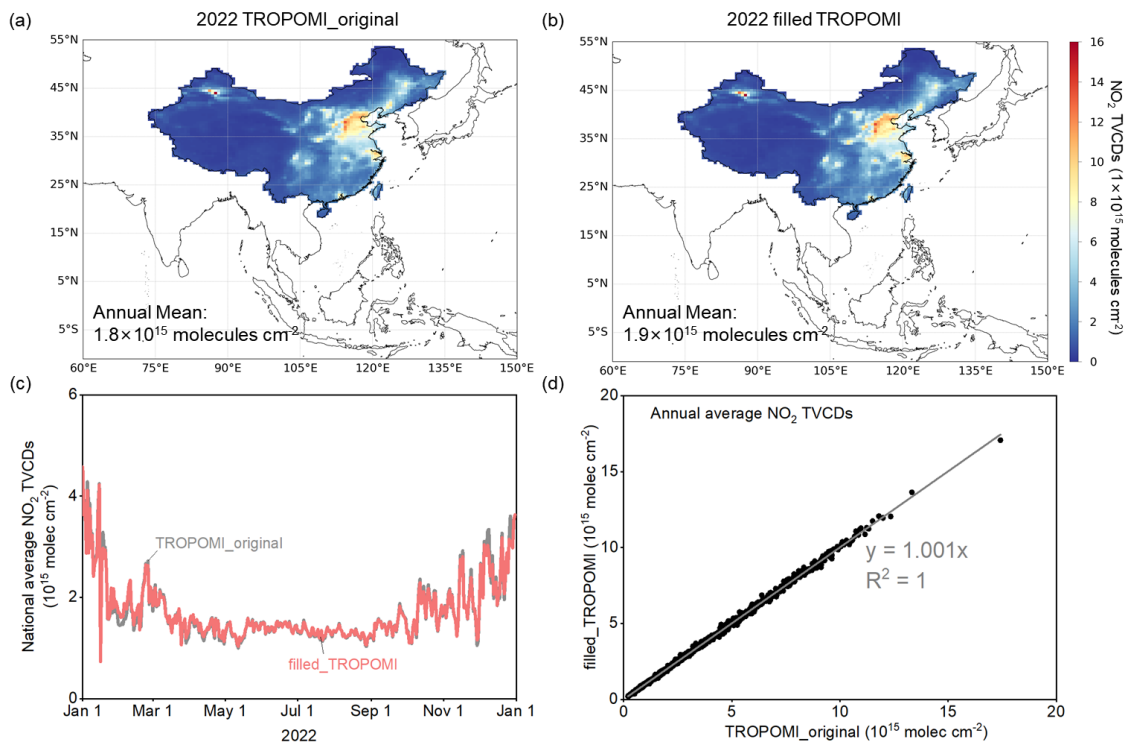

38

39 **Figure S2. The comparison of XGBoost filled TROPOMI and original TROPOMI**  
 40 **NO<sub>2</sub> TVCDs in 2022.** (a) shows the annual mean NO<sub>2</sub> TVCDs of original TROPOMI  
 41 sampling. (b) shows the annual mean NO<sub>2</sub> TVCDs of filled TROPOMI using XGBoost  
 42 method. (c) compares the daily national mean NO<sub>2</sub> TVCDs between original and filled  
 43 TROPOMI. (d) shows the correlation between original and filled TROPOMI NO<sub>2</sub> TVCDs  
 44 grid-by-grid.

45

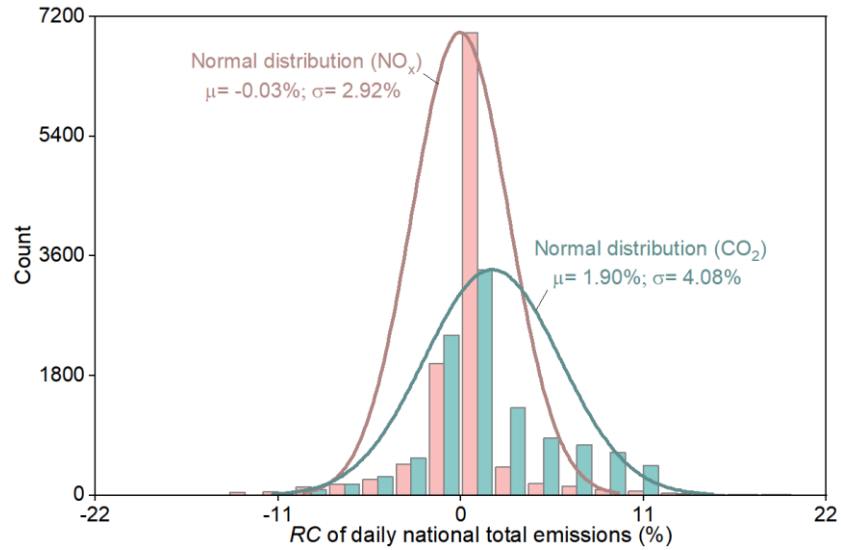

46

47 **Figure S3. RC distribution of daily national total emissions under all tests.** The overall  
 48 distribution of *RC* of daily national total emissions of NO<sub>x</sub> and CO<sub>2</sub> across all tests adheres  
 49 to a normal distribution. For NO<sub>x</sub>, the mean ( $\mu$ ) and standard deviation ( $\sigma$ ) are -0.03% and  
 50 2.92%, respectively, while for CO<sub>2</sub>, they are 1.90% and 4.08%. Given our discussion  
 51 focusing on CO<sub>2</sub> emissions,  $1\sigma = 4.0\%$  is thus chosen as the threshold for distinguishing  
 52 between consistent and inconsistent impacts.

53

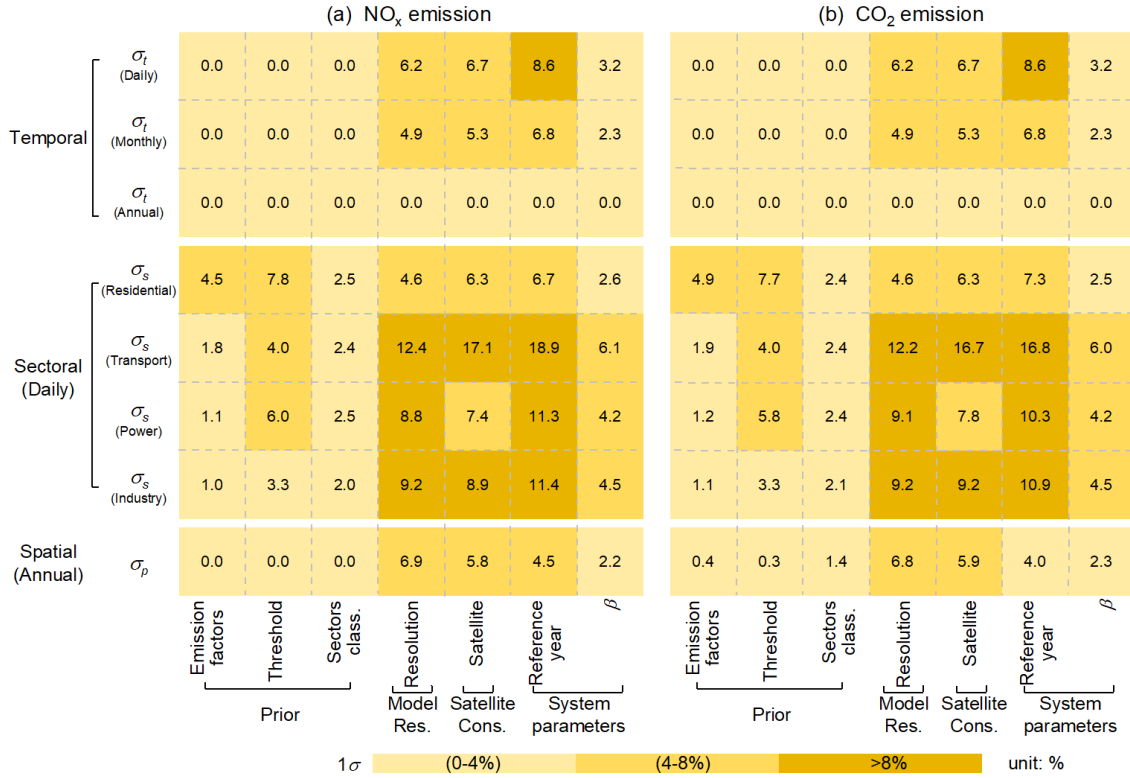

54

55 **Figure S4. An overview of consistency of tests' impacts on (a) NO<sub>x</sub> and (b) CO<sub>2</sub>**  
 56 **emissions across finer scales.** The orange color signifies one standard deviation (1 $\sigma$ ),  
 57 reflecting the degree of consistency in the impact of the corresponding test. A larger 1 $\sigma$   
 58 indicates greater inconsistency. Sectoral emissions consistency is depicted on a daily scale,  
 59 and spatial results are depicted on an annual provincial scale. The numbers within each  
 60 grid represent the corresponding 1 $\sigma$  on a certain dimension under tests.

61

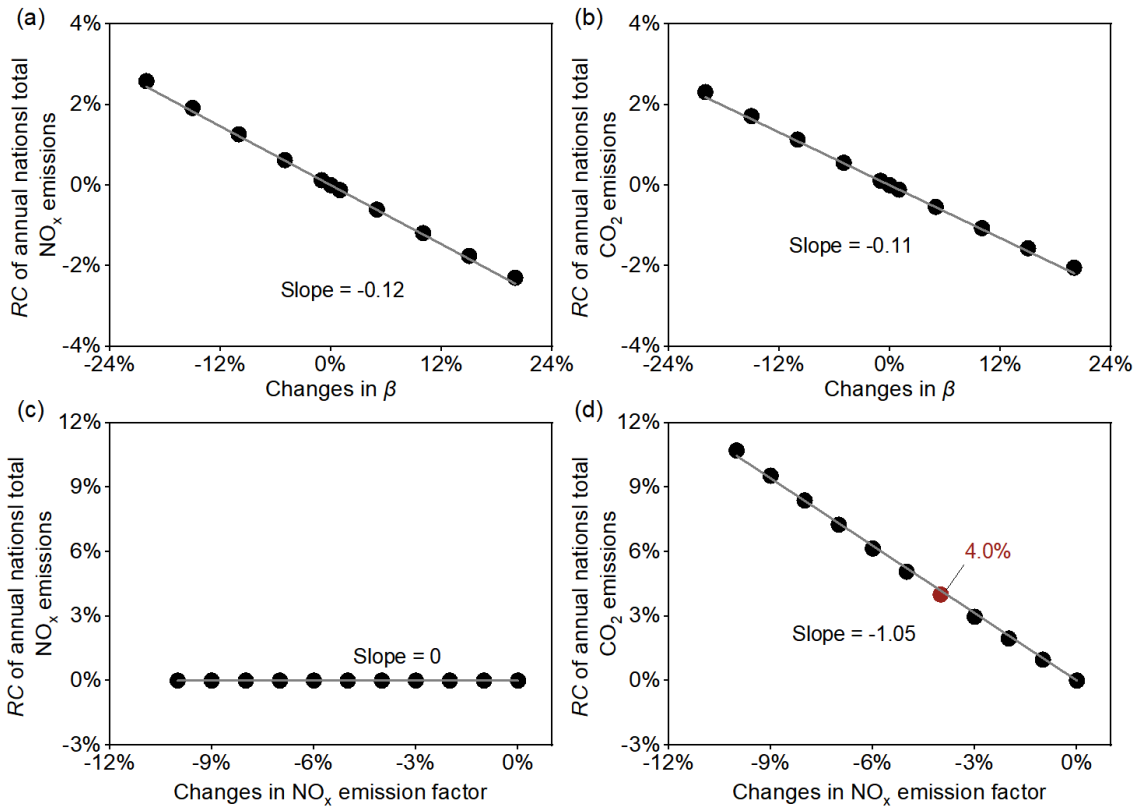

62

63 **Figure S5. Sensitivity of annual national total  $\text{NO}_x$  and  $\text{CO}_2$  emissions to  $\beta$  and  $\text{NO}_x$**   
 64 **emission factor. (a) and (c) present the estimated  $\text{NO}_x$  emissions under ten-level gradient**  
 65 **for  $\beta$  and emission factor variations. (b) and (d) are plotted for  $\text{CO}_2$  emissions as (a) and**  
 66 **(c).**

67

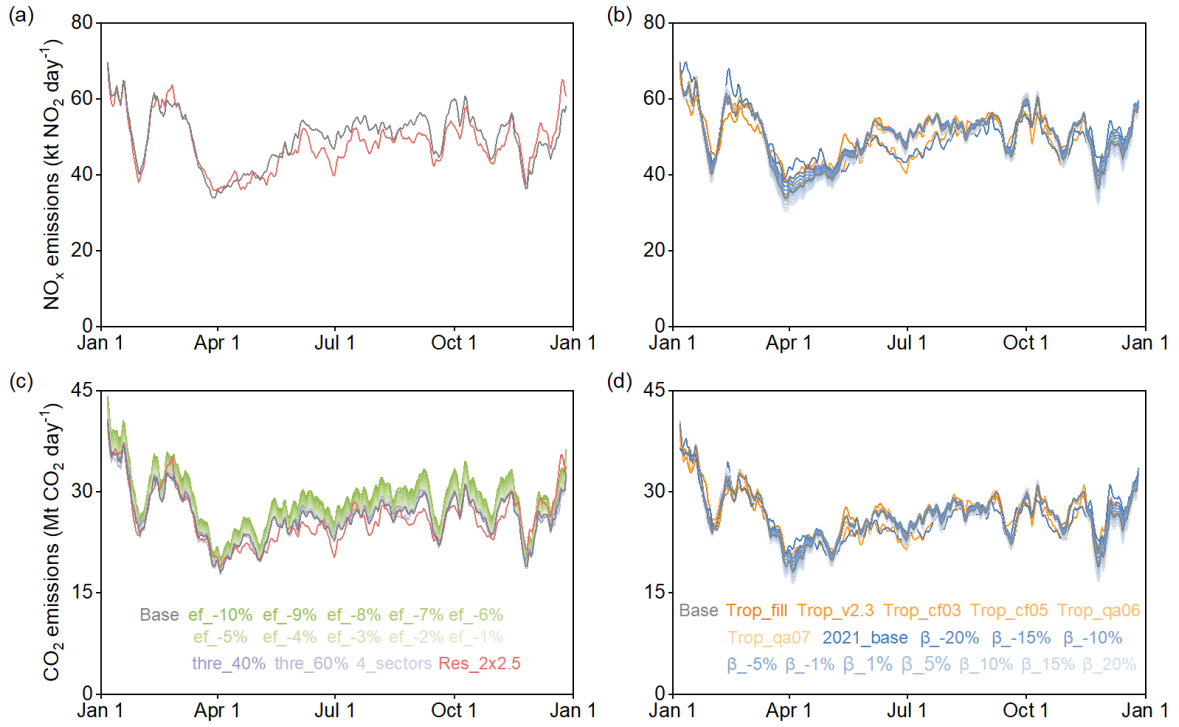

68

69 **Figure S6. Ten-day moving average NO<sub>x</sub> and CO<sub>2</sub> emissions in 2022 under different**  
 70 **sensitivity tests. (a) and (b) present the ten-day moving NO<sub>x</sub> emissions under all tests and**  
 71 **Base. (c) and (d) are plotted for CO<sub>2</sub> emissions as (a) and (b).**

72

73



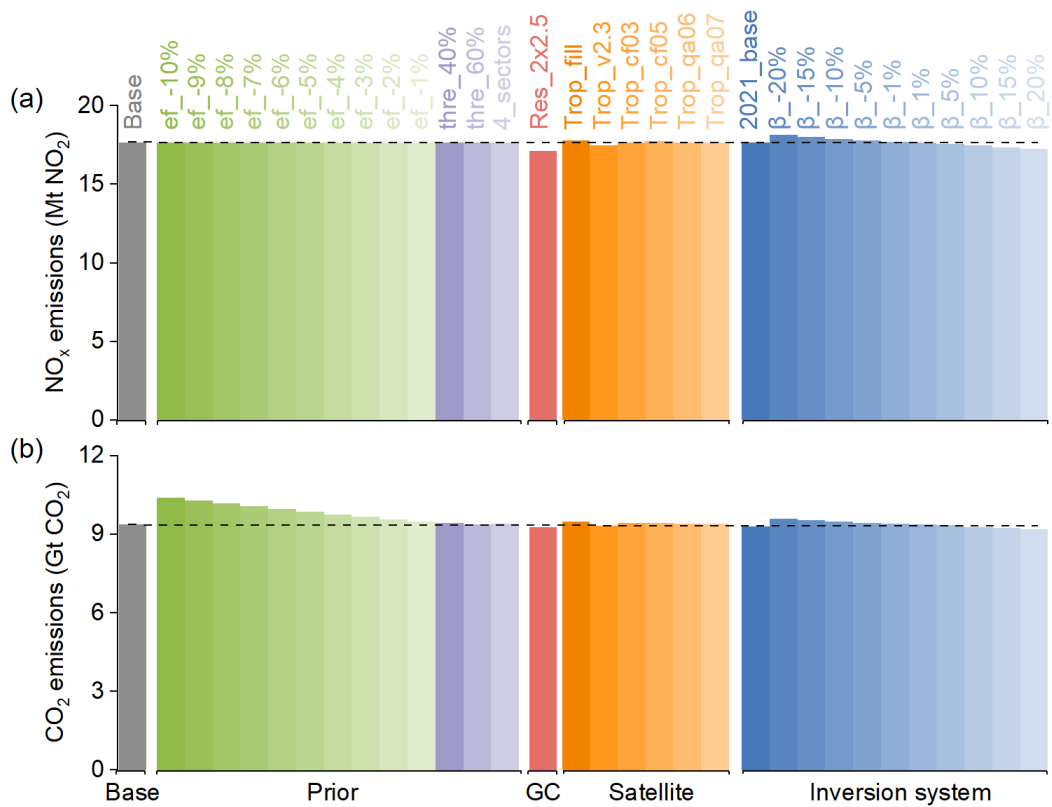

74

75 **Figure S7. Comparison of total (a) NO<sub>x</sub> and (b) CO<sub>2</sub> emissions in 2022 under various**  
 76 **sensitivity tests. Label above each column refer to the corresponding tests.**

77

78

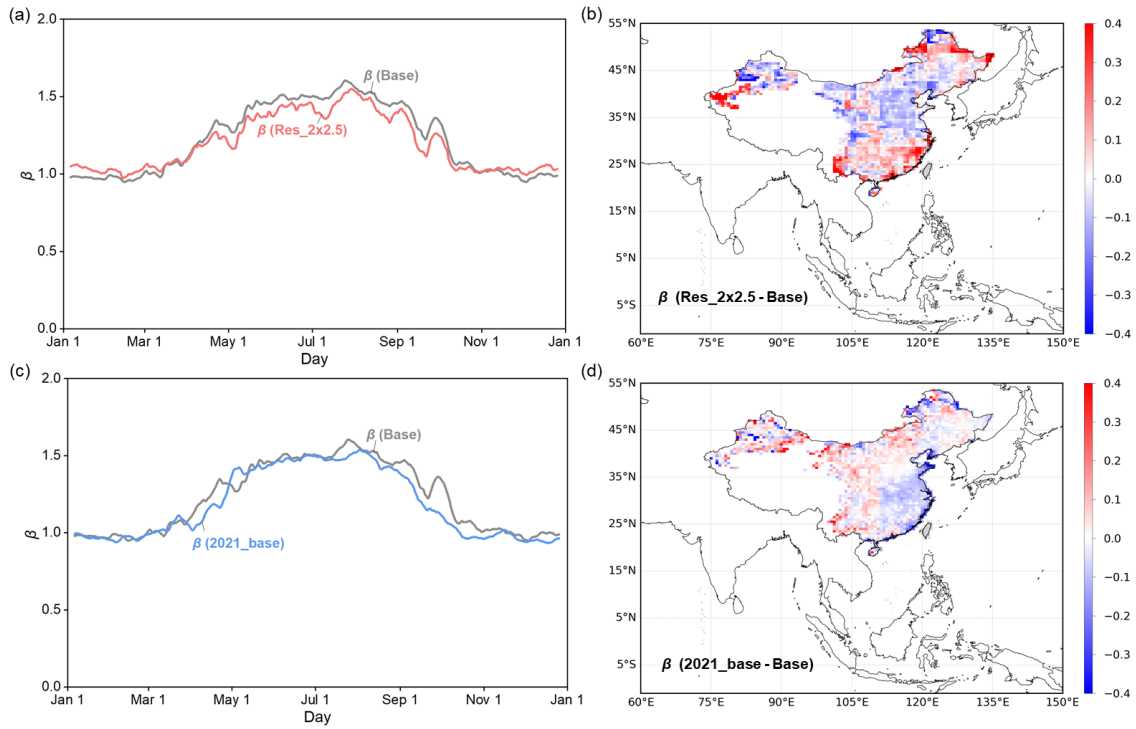

79

80 **Figure S8. Comparison of  $\beta$  between Res\_2 $\times$ 2.5 and Base, 2021\_base and Base. (a) and**  
 81 **(c) compare the daily  $\beta$  dynamics between Res\_2 $\times$ 2.5 and Base, and between 2021\_base**  
 82 **and Base, respectively. (b) and (d) present the spatial distribution of  $\beta$  variance between**  
 83 **Res\_2 $\times$ 2.5 and Base, and between 2021\_base and Base, respectively. The gray shaded area**  
 84 **is not calculated in this study.**

85

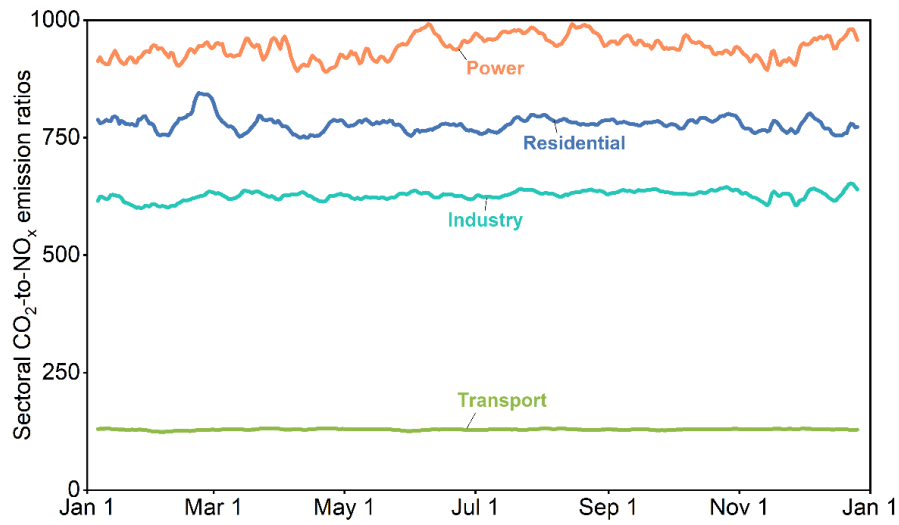

86

87 **Figure S9. Sectoral CO<sub>2</sub>-to-NO<sub>x</sub> emission ratios in 2022 under Base inversion.** Sectors  
88 are color coded.

89

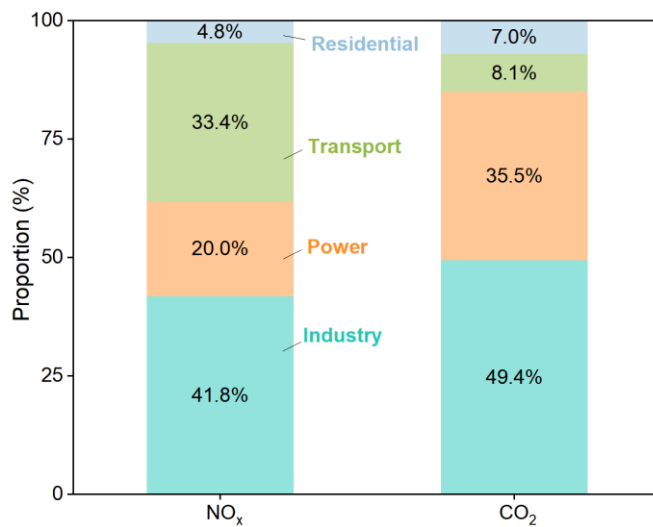

90

91 **Figure S10. Sectoral contribution to total NO<sub>x</sub> and CO<sub>2</sub> emissions in 2022 under Base**  
 92 **inversion.** Sectors are color coded.

93

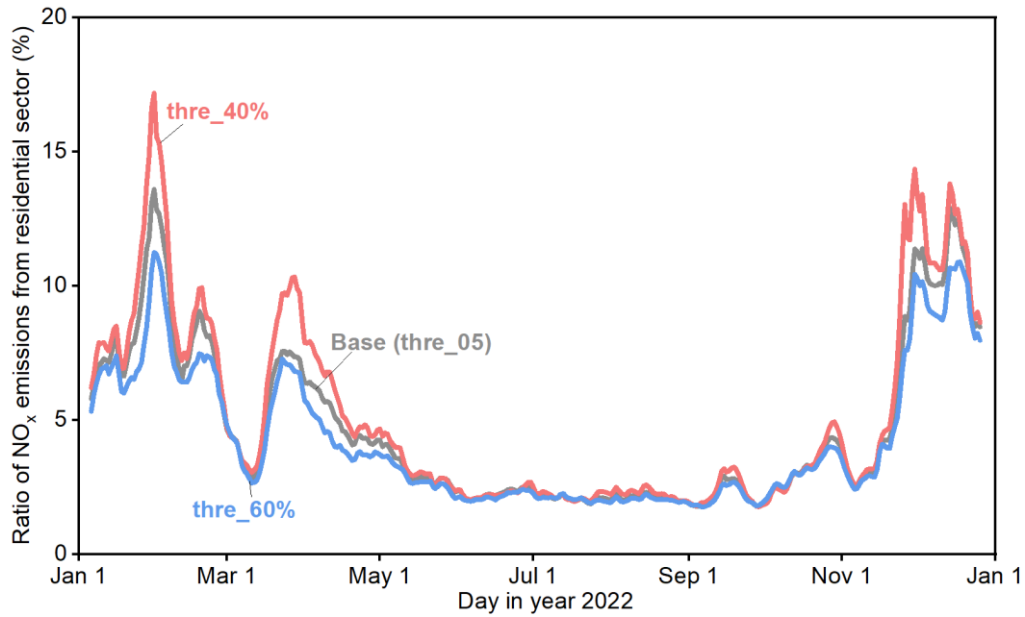

94

95 **Figure S11. The comparison of proportion attributing total TROPOMI-constrained**  
 96 **NO<sub>x</sub> emissions to the residential sector.** Black, red, and blue lines refer to the Base,  
 97 thre\_40% and thre\_60% inversions, respectively.

98

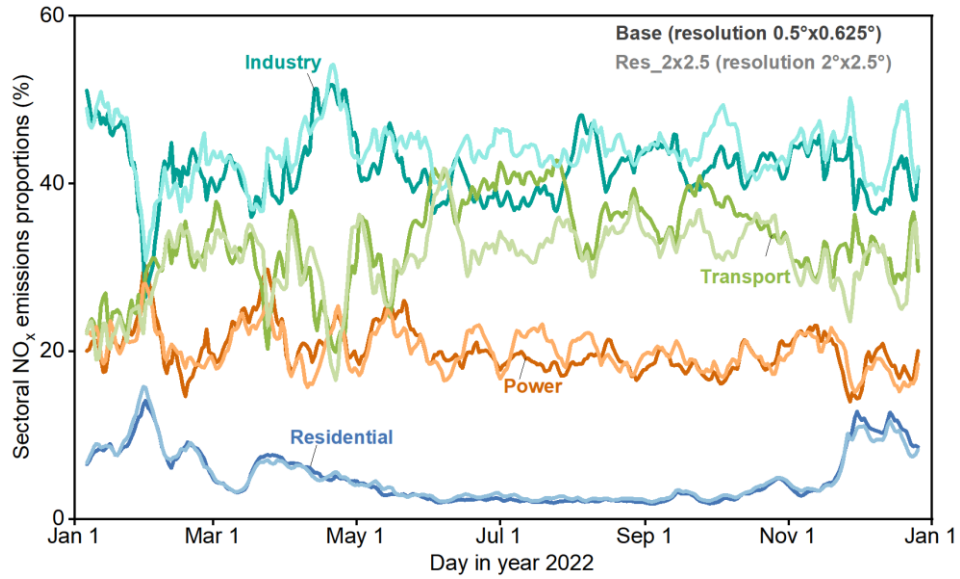

99

100 **Figure S12. The comparison of sectoral proportion of TROPOMI-constrained NO<sub>x</sub>**  
 101 **emissions.** Sectors are color coded. Deep color refers to the Base inversion, and light color  
 102 represents the Res\_2x2.5.

103

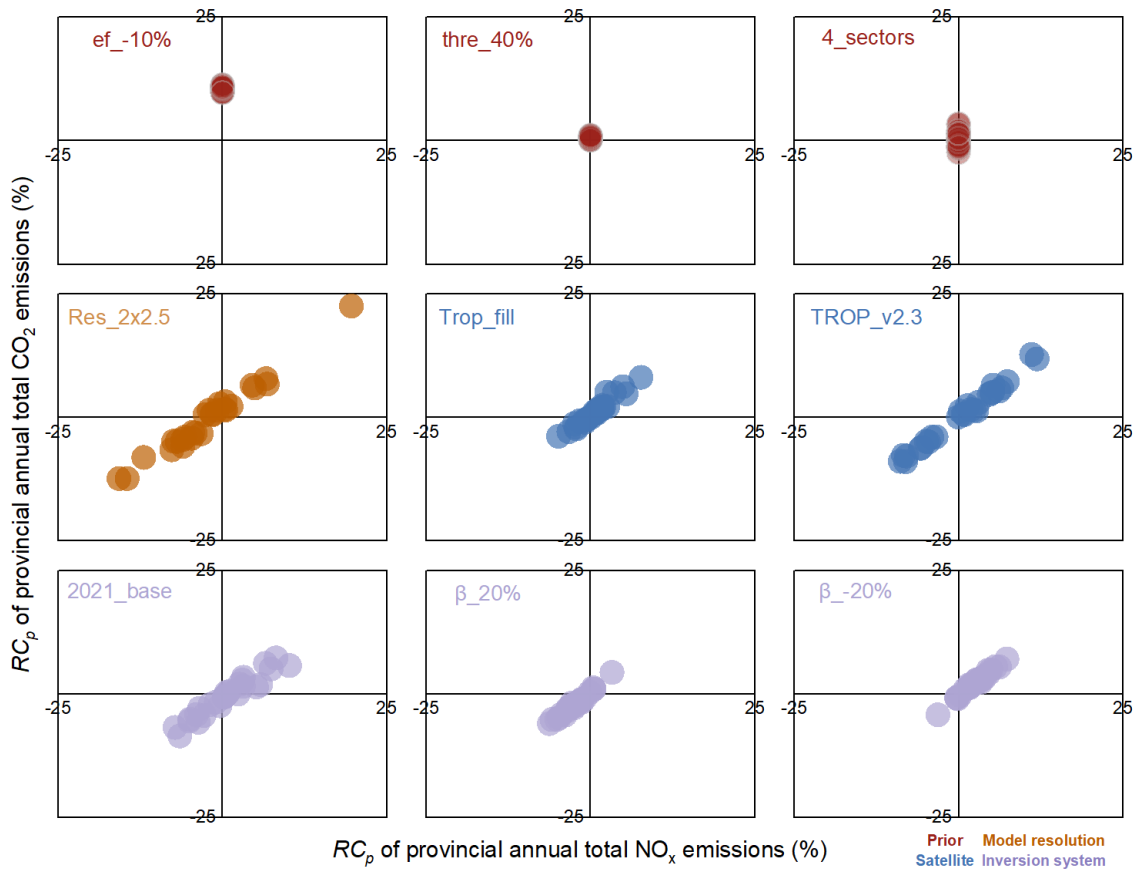

104

105 **Figure S13. Correlation between  $RC_p$  in provincial annual total NO<sub>x</sub> and CO<sub>2</sub>**  
 106 **emissions.** Scatters in red, orange, blue, and purple colors show the results from the tests  
 107 on prior, model resolution, satellite retrievals, and inversion system parameters,  
 108 respectively.

109

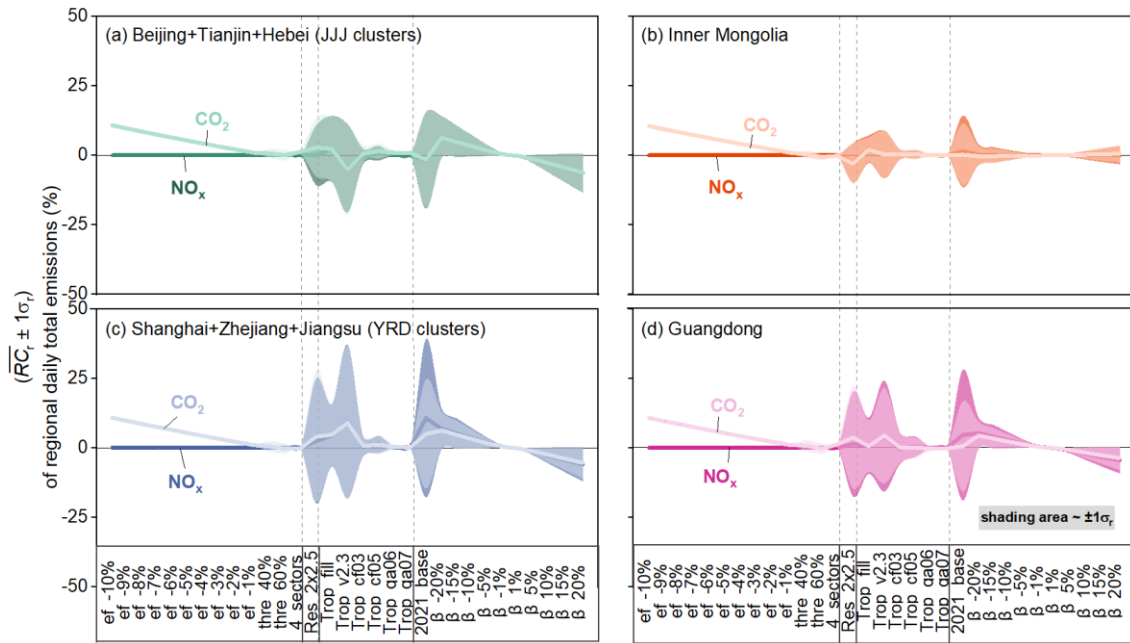

110

111 **Figure S14. Response of regional total NO<sub>x</sub> and CO<sub>2</sub> emissions under tests on a daily**  
 112 **scale. (a), (b), (c), and (d) show the  $\overline{RC}_r \pm 1\sigma_r$  of daily NO<sub>x</sub> (deep color) and CO<sub>2</sub> (light**  
 113 **color) emissions triggered by different tests in Jing-Jin-Ji clusters (Beijing, Tianjin, and**  
 114 **Hebei), Inner Mongolia, Yangtze River Delta clusters (Shanghai, Zhejiang, and Jiangsu),**  
 115 **and Guangdong.**

116



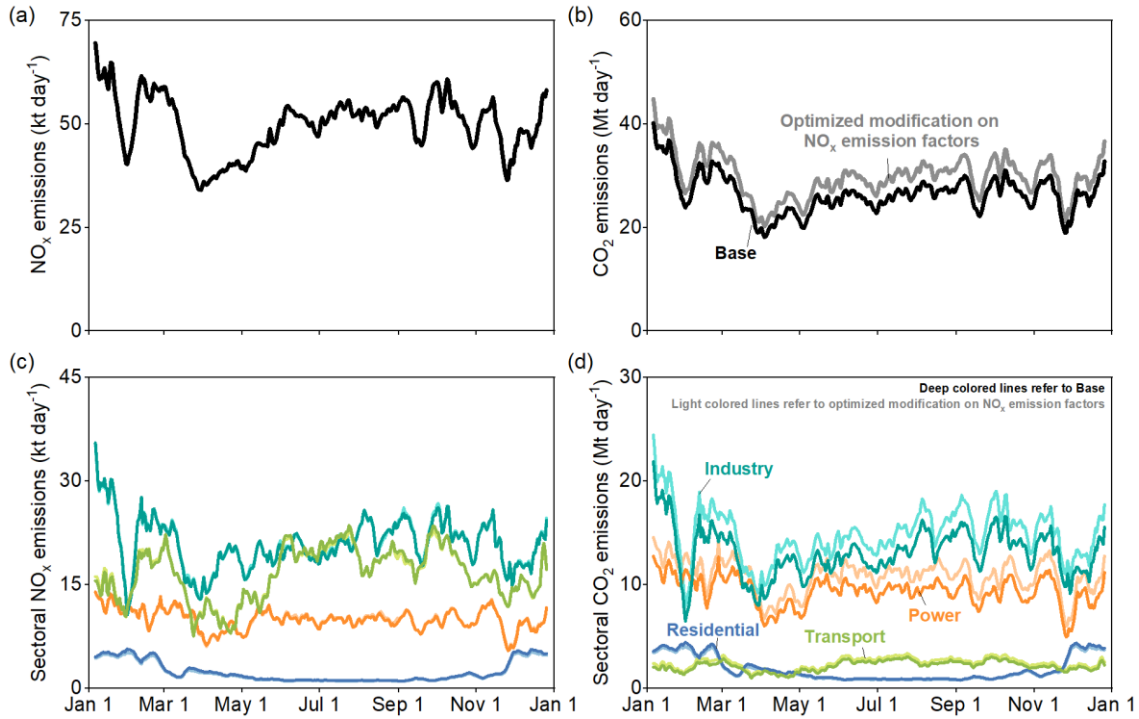

117

118 **Figure S15. Comparison of daily NO<sub>x</sub> and CO<sub>2</sub> emissions between Base and situation**  
 119 **with iteratively optimized modification on NO<sub>x</sub> emission factors. (a) and (c) present the**  
 120 **total and sectoral NO<sub>x</sub> emissions under Base (deep color) and situation with iteratively**  
 121 **optimized modification on NO<sub>x</sub> emission factors (light color). (b) and (d) are plotted for**  
 122 **CO<sub>2</sub> as (a) and (c).**
