# Supplementary material for: Air pollution satellite-based CO 2 emission inversion: system evaluation, sensitivity analysis, and future perspective
Source: Copernicus journal article supplement (doi:10.5194/egusphere-2024-1986), 2024-08-01
Supplement: Supplementary file [file egusphere-2024-1986-AC1-supplement.pdf]

## Reviewer: 1

This study presents a sensitivity analysis for a new inversion technique that estimates CO<sub>2</sub> emissions from co-emitted air pollutants (NO<sub>2</sub>). The inversion methodology is an interesting way of bypassing challenges in CO<sub>2</sub> remote sensing and takes advantage of the relative ease of NO<sub>2</sub> detection with remote sensing relative to CO<sub>2</sub>. While the methodology has been presented elsewhere in the literature with useful applications in real-time greenhouse gas monitoring, a rigorous assessment of its sensitivity to the different input variables is valuable for optimisation moving forwards. The separation of sensitivities into spatial, temporal etc. is particularly nice, especially as we strive for greater and greater resolution in these dimensions. This makes it easy to understand the limitations for specific use cases. In general, the manuscript is of high written and visual quality, and the analysis is sound. I have a few minor comments surrounding the prior NO<sub>x</sub> emissions as well as some suggestions below.

### Response:

We express our gratitude to the referee for providing constructive and positive feedback on our manuscript. Below, we offer detailed responses addressing each point raised

1. Line 89: What are the sector specific scaling factors? Which sectors and by how much they are scaled (inaccurate) is one of the most valuable outputs of this kind of methodology from a NO<sub>x</sub> standpoint. It would be nice to see a plot displaying this in the SI.

### Response:

We have added Fig. S2 in SI displaying sectoral correction factors, which mainly range from 0.5 to 1.5, and a brief explanation of this in Lines 127-128.

Lines 127-128: “The overall sectoral correction factors mainly range from 0.5 to 1.5 (Fig. S3).”

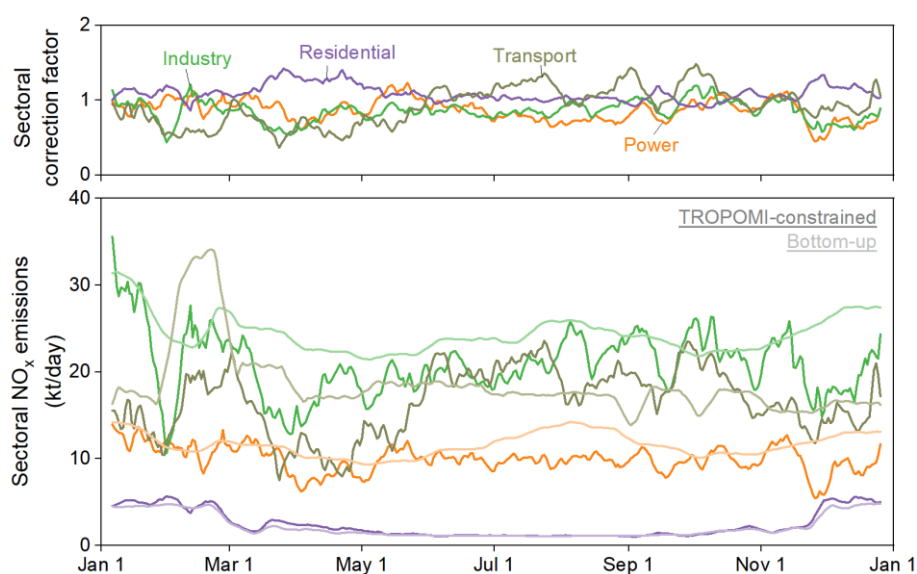

**Figure S3. The comparison between bottom-up and TROPOMI-constrained sectoral NO<sub>x</sub> emissions (Base inversion). The upper panel shows the sectoral**

30 correction factors.

2. Line 94: I have concerns about the accuracy of CO<sub>2</sub>-NO<sub>x</sub> emission ratios. My knowledge of Chinese emissions inventories is poor. However, in European emissions inventories emission factors for NO<sub>x</sub> can be very outdated. Perhaps this is taken into  
35 account with the scaling factors discussed in Line 89. I think a discussion of the emissions inventory in addition to the sector specific scaling factors, and even a comparison with other international emissions inventories would be useful e.g. EEA/EMEP, US EPA.

**Response:**

40 The CO<sub>2</sub>-to-NO<sub>x</sub> emission ratios (ERs) from the 2019 MEIC inventory are considered relatively reliable, having been validated in previous simulations (Zheng et al., 2021; Zheng et al., 2020). Although the changes in these ratios since 2019 remain uncertain, we assumed a reduction in NO<sub>x</sub> emission factors (EFs) while keeping CO<sub>2</sub> EFs constant from 2019 to 2022 to estimate updated CO<sub>2</sub>-to-NO<sub>x</sub> ERs for 2022. This assumption  
45 aligns with the ongoing emission control measures implemented by the Chinese government. To assess the influence of this assumption, we performed sensitivity tests on varying NO<sub>x</sub> EF reduction levels, which demonstrated a significant impact on CO<sub>2</sub> emissions. Additionally, a comparison of our CO<sub>2</sub>-to-NO<sub>x</sub> ERs with other international inventories (EDGAR and CEDS) shows our values fall within the mid-range.

50 To make these information clearer, we have added some explanation about the CO<sub>2</sub>-to-NO<sub>x</sub> emission ratios (ERs) in Lines 135-139 in the Manuscript and a detailed discussion of CO<sub>2</sub>-to-NO<sub>x</sub> ERs in Text S2 in SI, which includes the method of ERs updates, the sensitivity tests on this settings, and comparison with international emission inventories in China (EDGAR and CEDS).

55 Lines 135-139: “The CO<sub>2</sub>-to-NO<sub>x</sub> emission ratios in 2022 are updated by reducing NO<sub>x</sub> emission factors (EFs) while keeping CO<sub>2</sub> EFs unchanged based on 2019 MEIC. The default assumption that the reduction rate halves annually is due to the limited potential for further reductions. In contrast, the CO<sub>2</sub> EFs are assumed to remain unchanged, as they are primarily determined by fuel type and combustion conditions (Cheng et al.,  
60 2021) (details seen in Text S2).”

**Text S2. CO<sub>2</sub>-to-NO<sub>x</sub> emission ratios**

In this inversion system, the CO<sub>2</sub>-to-NO<sub>x</sub> emission ratios (ERs) are initially derived from the 2019 MEIC inventory, then updated for the target year (2022 in this study) by assuming a specific reduction in NO<sub>x</sub> EFs by sector while keeping CO<sub>2</sub> EFs constant.  
65 This approach aligns with the ongoing decline in NO<sub>x</sub> emissions due to pollution control measures, while CO<sub>2</sub> emissions remain more closely tied to fuel type and combustion conditions (Text S1). Accordingly, the CO<sub>2</sub>-to-NO<sub>x</sub> ERs are dependent on the reduction ratio of NO<sub>x</sub> EFs in this system (represented by the  $r_{NO_x s,i,y}$  in Eq. 5).

The reduction ratio of NO<sub>x</sub> EFs first influences the disaggregation of total NO<sub>x</sub> emissions to sectors, and then affects the sector-specific conversion from NO<sub>x</sub> to CO<sub>2</sub> emissions. To evaluate this impact, we set a gradient test with a NO<sub>x</sub> EFs reduction range from 1% to 10% (ef\_<sub>[-10%, -1%]</sub>). Results indicate a notable impact on CO<sub>2</sub> emissions, affecting annual national CO<sub>2</sub> totals by up to 10.7% (Details discussed in Manuscript). This finding emphasizes the need for a more precise approach to setting  
75 NO<sub>x</sub> emission reduction ratios in future refinements, such as incorporating an iterative

adjustment within the bottom-up process to better align bottom-up and TROPOMI-constrained sectoral NO<sub>x</sub> emissions (as mentioned in the Discussion).

80 We further compare the CO<sub>2</sub>-to-NO<sub>x</sub> ERs of MEIC with some international inventories, including the Emissions Database for Global Atmospheric Research (EDGAR, [https://edgar.jrc.ec.europa.eu/dataset\\_ap81](https://edgar.jrc.ec.europa.eu/dataset_ap81)) (Crippa et al., 2020) and the Community Emissions Data System (CEDS) (McDuffie et al., 2020), for the year 2019. Given the different categorization structures in these inventories, we focus on comparing the overall CO<sub>2</sub>-to-NO<sub>x</sub> ERs, which are 493.7 for MEIC, 571.5 for EDGAR, and 462.6 for CEDS. The emission factors in MEIC are more spatially and sectorally refined for China, making its CO<sub>2</sub>-to-NO<sub>x</sub> ERs more representative of China-specific emissions (Zheng et al., 2018).

3. Line 104: Where does this 40% reduction come from? This is not discussed in the text.

90 **Response:**

The 40% reduction in simulation is used to quantify the response of NO<sub>2</sub> concentration to the changes in anthropogenic NO<sub>x</sub> emission ( $\beta$ ), building on previous works. In our previous tests, this perturbation magnitude seems to have a limited impact on final estimates within the tested range of 30-50%. We have added a brief explanation in Lines 110-112 in Manuscript.

95 Lines 110-112: “The 40% reduction was selected after a series of sensitivity tests, which demonstrated that this perturbation level exerts a limited impact on the  $\beta$  estimates (Zheng et al., 2020).”

100 4. Line 135: How do the sector scaling factors in Line 89 compare to the -1 to -10 % gradient system? Is -10 % a high enough threshold? Why do you only consider a negative range?

**Response:**

105 China has enforced stringent emission controls on anthropogenic NO<sub>x</sub> emissions for decades, achieving substantial reductions. Since 2012, NO<sub>x</sub> emissions in China have been consistently decreasing; however, as reduction potential diminishes, the rate of decrease has recently begun to slow (Li et al., 2023). For instance, between 2013 and 2017, the annual reduction rate in NO<sub>x</sub> emissions was around 5.2%, but it slowed to 3.2% between 2018 and 2020 (Geng et al., 2024). Consequently, a 10% reduction in NO<sub>x</sub> emission factors now represents a challenging and idealized scenario.

110 Regarding the exclusive consideration of negative trends, ongoing emission control policies and actions further underscore the continuous downward trajectory of NO<sub>x</sub> emissions, as consistently reported by recent studies (Geng et al., 2024; Li et al., 2023). Thus, a downward shift in NO<sub>x</sub> emission factors over time is more consistent with the current policies.

115

**Grammatical:**

5. Line 11: Suggest removal of “to prevent irreversible damage”. Not needed and air pollution is generally not irreversible.

**Response:**

120 We have removed the “to prevent irreversible damage” in Line 12 (original 11) as suggested.

6. Line 24: add “the” after “example,”.

**Response:**

125 We have added “the” in Line 24 as suggested.

7. Line 28: Suggest change to “how much, where, and by what activity pollutants are released...”.

**Response:**

130 We have modified the Line 29 (original 28) as suggested, as shown below:

Line 29: “The knowledge of emissions, i.e., how much, where, and by what activity pollutants are released into the atmosphere,”

8. Line 61: Suggest change “Our analytical endeavour” to “This study investigates”.

135 **Response:**

We have changed the to “This study investigates” in Line 71 (original 61) as suggested.

Line 71: “This study investigates how emission outcomes respond to a variety of sensitivity assessments across temporal, sectoral, and spatial dimensions.”

140 9. Line 217: Suggest removal of“(all columns except the first one)”. No need to clarify.

**Response:**

We have removed “all columns except the first one” in Line 251 (original 217) as suggested.

145 10. Line 258: Suggest replacement of “least” with “low”.

**Response:**

We have replaced the “least” with “low” in Line 291 (original 258) as suggested.

**Figures/Tables:**

150 11. Fig S5: misspelling of national in y-axis label.

**Response:**

We have corrected the spelling of “national” in the y-axis label in Fig. S7 (original Fig.

S5), as shown below.

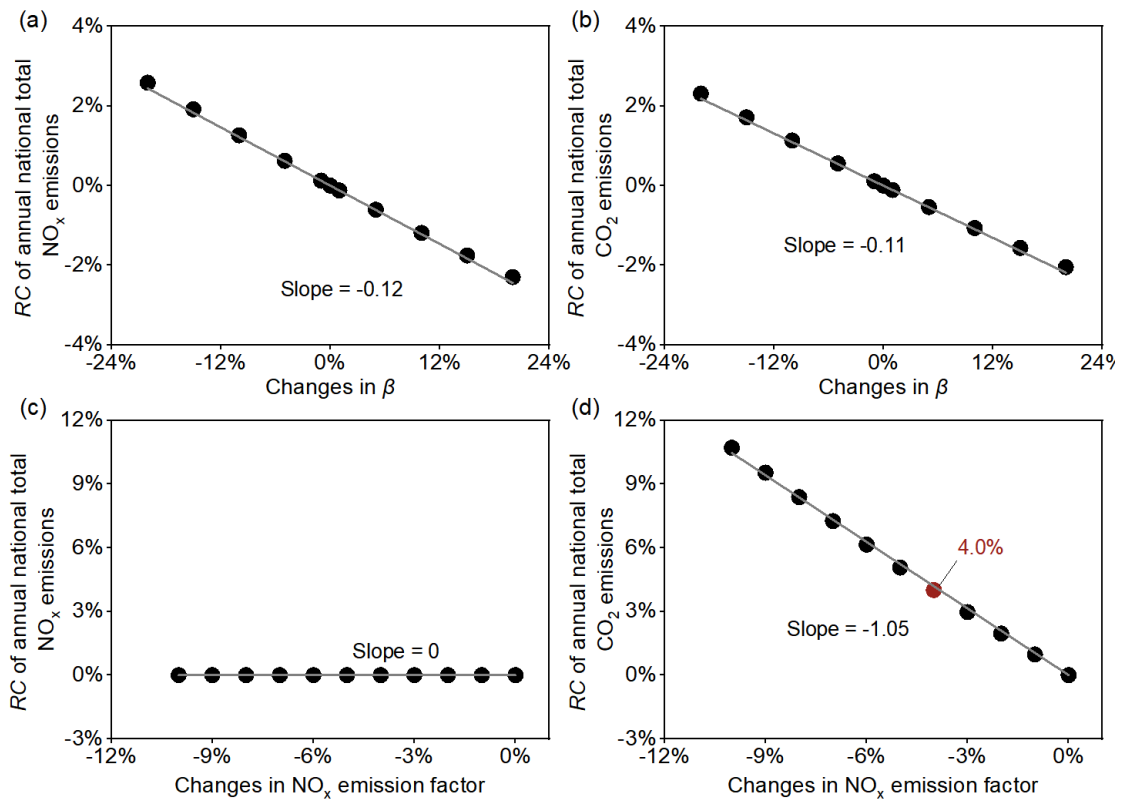

155 **Figure S7. Sensitivity of annual national total  $\text{NO}_x$  and  $\text{CO}_2$  emissions to  $\beta$  and  $\text{NO}_x$  emission factor.** (a) and (c) present the estimated  $\text{NO}_x$  emissions under a ten-level gradient for  $\beta$  and emission factor variations. (b) and (d) are plotted for  $\text{CO}_2$  emissions as (a) and (c).

160 12. Fig S11: It would be good to see this plot vs temperature. Why is there such a big drop in March? If it is correlated well, this would be a good verification of the system.

**Response:**

We have added the heating degree day (HDD) in Fig. S13 (original S11), which shows a good agreement with the residential emission dynamics.

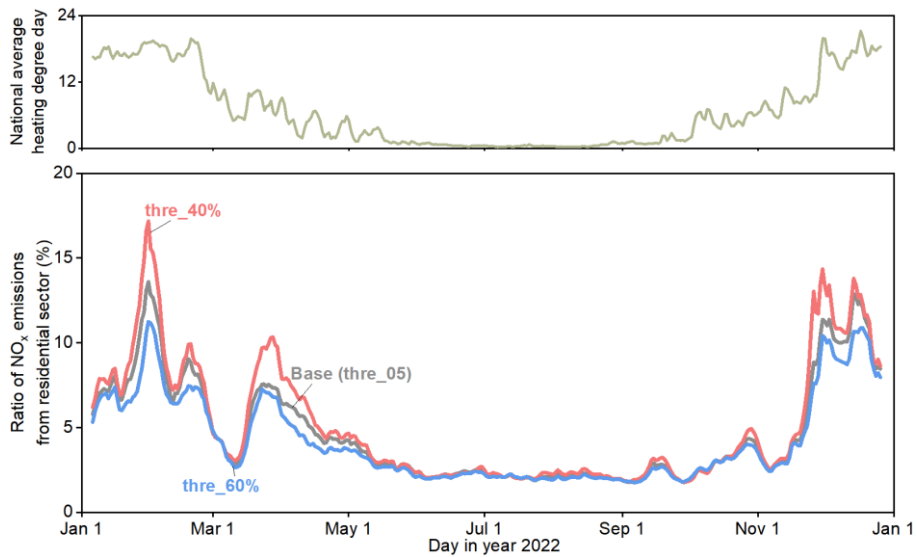

165

**Figure S13. The comparison of proportion attributing total TROPOMI-constrained NO<sub>x</sub> emissions to the residential sector.** Black, red, and blue lines refer to the Base, thre\_40%, and thre\_60% inversions, respectively. The upper panel displays the temporal variation of the national average heating degree day.

170

13. Table 1: Please can you clarify what you mean by “reduction ratio of NO<sub>x</sub> EFs halves annually”?

**Response:**

175 The “reduction ratio of NO<sub>x</sub> EFs halves annually” means that each year’s reduction rate for NO<sub>x</sub> EFs is set to decrease by half compared to the previous year. For example, if the reduction of NO<sub>x</sub> EFs from 2019 to 2020 was 4%, the reduction from 2020 to 2021 would be set at 2%.

We have added an explanation in the Note below Table 1 in Lines 149-150:

180 Lines 149-150: “\*Each year’s reduction rate for NO<sub>x</sub> EFs is set to decrease by half compared to the previous year. For example, if the reduction of NO<sub>x</sub> EFs from 2019 to 2020 was 4%, the reduction from 2020 to 2021 would be set at 2%.”

## Reference:

- 185 Cheng, J., Tong, D., Liu, Y., Bo, Y., Zheng, B., Geng, G., He, K., and Zhang, Q.: Air quality and health benefits of China's current and upcoming clean air policies, *Faraday Discussions*, 226, 584-606, <https://doi.org/10.1039/D0FD00090F>, 2021.
- Crippa, M., Solazzo, E., Huang, G., Guizzardi, D., Koffi, E., Muntean, M., Schieberle, C., Friedrich, R., and Janssens-Maenhout, G.: High resolution temporal profiles in the Emissions Database for Global Atmospheric Research, *Scientific Data*, 7, 121, 10.1038/s41597-020-0462-2, 2020.
- 190 Geng, G., Liu, Y., Liu, Y., Liu, S., Cheng, J., Yan, L., Wu, N., Hu, H., Tong, D., Zheng, B., Yin, Z., He, K., and Zhang, Q.: Efficacy of China's clean air actions to tackle PM<sub>2.5</sub> pollution between 2013 and 2020, *Nature Geoscience*, 17, 987-994, 10.1038/s41561-024-01540-z, 2024.
- Li, S., Wang, S., Wu, Q., Zhang, Y., Ouyang, D., Zheng, H., Han, L., Qiu, X., Wen, Y., Liu, M., Jiang, Y., Yin, D., Liu, K., Zhao, B., Zhang, S., Wu, Y., and Hao, J.: Emission trends of air pollutants and CO<sub>2</sub> in China from 2005 to 2021, *Earth Syst. Sci. Data*, 15, 2279-2294, <https://doi.org/10.5194/essd-15-2279-2023>, 2023.
- 195 McDuffie, E. E., Smith, S. J., O'Rourke, P., Tibrewal, K., Venkataraman, C., Marais, E. A., Zheng, B., Crippa, M., Brauer, M., and Martin, R. V.: A global anthropogenic emission inventory of atmospheric pollutants from sector- and fuel-specific sources (1970–2017): an application of the Community Emissions Data System (CEDS), *Earth Syst. Sci. Data*, 12, 3413-3442, 10.5194/essd-12-3413-2020, 2020.
- Zheng, B., Zhang, Q., Geng, G., Chen, C., Shi, Q., Cui, M., Lei, Y., and He, K.: Changes in China's anthropogenic emissions and air quality during the COVID-19 pandemic in 2020, *Earth Syst. Sci. Data*, 13, 2895-2907, <https://doi.org/10.5194/essd-13-2895-2021>, 2021.
- 205 Zheng, B., Geng, G., Ciais, P., Davis, S. J., Martin, R. V., Meng, J., Wu, N., Chevallier, F., Broquet, G., Boersma, F., van der A, R., Lin, J., Guan, D., Lei, Y., He, K., and Zhang, Q.: Satellite-based estimates of decline and rebound in China's CO<sub>2</sub> emissions during COVID-19 pandemic, *Science Advances*, 6, eabd4998, <https://doi.org/10.1126/sciadv.abd4998>, 2020.
- Zheng, B., Tong, D., Li, M., Liu, F., Hong, C., Geng, G., Li, H., Li, X., Peng, L., Qi, J., Yan, L., Zhang, Y., Zhao, H., Zheng, Y., He, K., and Zhang, Q.: Trends in China's anthropogenic emissions since 2010 as the consequence of clean air actions, *Atmos. Chem. Phys.*, 18, 14095-14111, <https://doi.org/10.5194/acp-18-14095-2018>, 2018.
- 210
