# Supplementary material for: Air pollution satellite-based CO 2 emission inversion: system evaluation, sensitivity analysis, and future perspective
Source: Copernicus journal article supplement (doi:10.5194/egusphere-2024-1986), 2024-08-01
Supplement: Supplementary file [file egusphere-2024-1986-AC2-supplement.pdf]

## Reviewer: 2

5 This work presents a robust uncertainty analysis for an established mass balance inversion scheme capable of inferring CO<sub>2</sub> emissions from TROPOMI's NO<sub>2</sub> measurements. While I do not take issue with the results presented in this manuscript, I found myself carefully re-reading the text multiple times to try and find information I felt to be crucial to the methodology. Some of the information was found after multiple readings while some remained elusive. The omission of certain points in the methodology section and its lack of organization made reading difficult. I have listed my comments, both major and minor, below.

### 10 **Response:**

We express our gratitude to the referee for constructive remarks regarding our manuscript. Below, we provide detailed responses addressing each point raised.

### **Major Comments**

15 1. In Lines 38-40, the text mentions the “co-emissions characteristics in time and space” of NO<sub>2</sub> and CO<sub>2</sub> emissions, leveraging the linear relationship between the two (Yang et al., 2023; Fig. 1). However, in other work by the author (Li and Zheng, 2024; Paper highlight #2), they state that NO<sub>x</sub> and CO<sub>2</sub> are inversely proportional (at least during COVID lockdowns). Upon first reading, this seems like a contradiction. Perhaps the  
20 relationship between NO<sub>x</sub> and NO<sub>2</sub> emissions should also be discussed in the introduction, near lines 38-40. At least conceptually highlight the conversion from TROPOMI NO<sub>2</sub> to NO<sub>x</sub> here, particularly how works (eqn. 2).

### **Response:**

25 Anthropogenic NO<sub>x</sub> and CO<sub>2</sub> are co-emitted, yet their sector-specific emission ratios differ, leading to potentially distinct trends in their total emissions. Specifically, emission controls implemented by the Chinese government have reduced NO<sub>x</sub> emission factors (EFs) over time, while CO<sub>2</sub> EFs have remained stable, primarily due to their dependence on fuel type and combustion conditions. Thus, given the asynchronous changes in activity levels, NO<sub>x</sub> EFs, and CO<sub>2</sub> EFs, differing trends in overall NO<sub>x</sub> and  
30 CO<sub>2</sub> emissions are possible.

In the NO<sub>x</sub> family, NO is the primary species emitted and undergoes rapid conversion to NO<sub>2</sub>, which is also the component detectable by most satellites. Therefore, NO<sub>2</sub> effectively serves as a proxy for NO<sub>x</sub> emissions in inversion studies. NO<sub>x</sub> is a short-lived species, making its concentrations highly sensitive to emission sources. This  
35 enables the use of mass-balance methods to estimate NO<sub>x</sub> emissions, which rely on the assumption of a linear relationship between NO<sub>2</sub> columns and local NO<sub>x</sub> emissions (Cooper et al., 2017; Mun et al., 2023; Martin et al., 2003).

We have added some explanations in Lines 42-46, Lines 48-50, and Lines 98-100 in Manuscript.

40 Lines 42-46: “NO<sub>2</sub> forms rapidly after NO is emitted from sources and is also the primary nitrogen oxide detectable by most satellites (Ye et al., 2016). This makes NO<sub>2</sub> a reliable and widely adopted proxy in nitrogen oxides (NO<sub>x</sub> = NO<sub>2</sub>+NO) emission inversions. However, the co-emission of NO<sub>x</sub> and CO<sub>2</sub> does not imply synchronized

45 trends in their emissions, as the CO<sub>2</sub>-to-NO<sub>x</sub> emission ratios and activity trends vary across different sectors (Li and Zheng, 2024).”

Lines 48-50: “This short lifespan of NO<sub>2</sub> facilitates mass-balance approaches for estimating NO<sub>x</sub> emissions, which rely on the assumption of a linear relationship between NO<sub>2</sub> columns and local NO<sub>x</sub> emissions (Cooper et al., 2017; Mun et al., 2023; Martin et al., 2003).”

50 Lines 98-100: “A critical step in this process was establishing a linear relationship between NO<sub>2</sub> tropospheric vertical column densities (TVCDs) and anthropogenic NO<sub>x</sub> emissions under the mass balance assumption (Eq. 2) through GEOS-Chem simulation (v12.3.0, <https://geoschem.github.io/>) at a horizontal resolution of 0.5°×0.625°.”

55 2. Lines 46–50 claim that space-based observers of NO<sub>2</sub> have surpassed CO<sub>2</sub> observers in revisits, spatial resolution, and coverage. However, I question at least some aspects of this statement. While TROPOMI has a daily revisit time, it is restricted to a ~1:30 pm overpass time. The CO<sub>2</sub>-observing OCO-3 instrument provides coverage at  
60 different times throughout daytime hours, providing the potential to elucidate diurnal emissions (albeit with a ~3 day revisit time). Additionally, OCO-3 has a higher spatial resolution than TROPOMI, on the order of 2km x 2km. Thus, it is my opinion that Lines 46-50 make unfair statements by not acknowledging the benefits of the OCO-3 instrument.

**Response:**

65 We have rephrased this sentence acknowledging the development of CO<sub>2</sub> satellites in Lines 53-60.

Lines 53-60: “Moreover, remote sensing technologies for NO<sub>2</sub> remain generally more mature, as indicated by the broader coverage and improved signal-to-noise ratio in column concentration observation (Macdonald et al., 2023; Cooper et al., 2022). Recent  
70 advancements in CO<sub>2</sub> satellite technology are promising, such as the Orbiting Carbon Observatory-3 (OCO-3), which can generate CO<sub>2</sub> maps with a resolution of up to 1.6 km × 2.2 km and monitor CO<sub>2</sub> columns at different times throughout the daytime to elucidate diurnal emission patterns (Taylor et al., 2023), while its spatial coverage may not be sufficient for large-area inversions at high temporal resolution.”

75

3. Furthermore, this paper does not take into account the most recent efforts to measure sector-specific CO<sub>2</sub> emissions at a sub-annual scale (see Roten et al., 2023 for example). The title of this work “Air Pollution Satellite-based CO<sub>2</sub> Emission Inversion: System Evaluation, Sensitivity Analysis, and Future Perspective” suggests that the focus will  
80 be on the uncertainty/error of the posterior CO<sub>2</sub> estimates. There is little discussion of the current uncertainties of these measurements, approximated with “direct” CO<sub>2</sub> observations, not NO<sub>x</sub>. Results should be presented in light of recent OCO-2, OCO-3, etc work. Several publications include city- and sub-city-level emission estimates using CO<sub>2</sub> observations, not CO<sub>2</sub> approximations. Consider uncertainties determined by Yang et al., 2020 and Ye et al., 2020 presenting constraints on CO<sub>2</sub> emissions using CO<sub>2</sub> observations directly. (Of course, results presented here are sector-specific. Yang and Ye are not.)  
85

(Roten: <https://agupubs.onlinelibrary.wiley.com/doi/full/10.1029/2023GL104376>)

(Yang: <https://agupubs.onlinelibrary.wiley.com/doi/full/10.1029/2019JD031922>)

90 (Ye: <https://agupubs.onlinelibrary.wiley.com/doi/full/10.1029/2019JD030528>)

**Response:**

We have added some discussion of CO<sub>2</sub>-observing CO<sub>2</sub> emission inversion in the Discussion Section (Lines 432-436).

95 Lines 432-436: “Notably, remarkable advancements have been achieved in estimating subnational CO<sub>2</sub> emissions through CO<sub>2</sub>-observing satellites, such as sectoral CO<sub>2</sub> assessments with OCO-3 (Roten et al., 2023), and urban emission optimizations utilizing the Orbiting Carbon Observatory-2 (OCO-2) (Yang et al., 2020; Ye et al., 2020). Yet, reducing uncertainties at subnational scales remains an ongoing challenge.”

100 4. The authors should consider reordering the methodology sections. For example, moving 2.1 (Base Inversion) after 2.2.4 and updating the text would let Sections 2.2.1-2.2.4 provide more context in the presentation of equations 1-4. The way the methodology is currently presented is quite confusing. I found myself rereading these sections multiple times to really understand what was going on. Several of these  
105 sections are missing helpful information. For example, the section titled “Prior Emission Inventory” (2.2.1) never actually mentions the name of the inventory being used. This made tracking down information difficult throughout my reading of the manuscript. Furthermore, for readers who are unfamiliar with the MEIC inventory, a figure like Fig. 1 of Roten et al., 2023 would be helpful.

110 **Response:**

The original structure of the Methods section is organized as follows: we begin with an overview of the inversion methodology, using the Base inversion as a foundational example. This is followed by a detailed explanation of the rationale and methodology behind the sensitivity tests. To enhance clarity in discussing the total of 31 tests, we  
115 categorized the tested parameters into four classes based on their functions within the system. These categories include changes in prior updates, coarser model resolution, modifications to satellite observational constraints, and other systematic parameters, as depicted in Figure 1. To clarify our approach and reduce misleading, we have added more details about the methodology and re-order them in Section 2.1 (please refer to the Manuscript to track the changes in Section 2.1), added some explanatory notes, and  
120 revised the subtitles of Sections 2.1 and 2.2 as follows:

Sub-titles of 2.1: “2.1 Inversion methodology and Base inversion”

Line 87: “We use the Base inversion as a case to provide a detailed explanation of this inversion system.”

125 Sub-titles of 2.2: “Sensitivity settings”

Line 152-158 “The sensitivity inversion experiments comprise 31 tests designed to provide a comprehensive evaluation of the system. To facilitate a clearer discussion of their impacts, we categorized these tests into four classes based on their roles within the system: prior information, GEOS-Chem model resolution, satellite observational  
130 constraints, and inversion system parameters (Fig. 1 and Table 2). Each test is

conducted as a controlled experiment, where only one parameter is altered while the rest remain the same as their Base inversion setting. The rationale behind the settings and their design will be elaborated in the following sections.”

Sub-titles of 2.2.1: “Modifying prior emission estimates”

135 Sub-titles of 2.2.2: “Employing coarser model resolution”

Sub-titles of 2.2.3: “Changing satellite observational constraints”

Sub-titles of 2.2.4: “Tests on inversion system parameters”

Besides, we have added a Fig. S2 displaying MEIC inventory in SI as suggested.

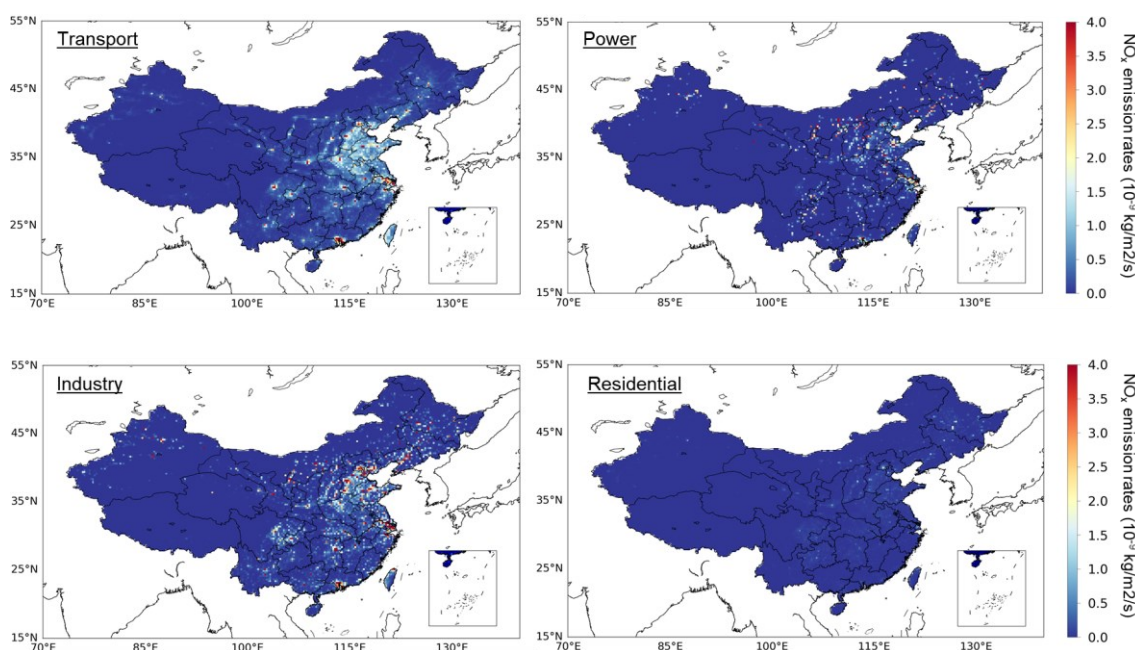

140 **Figure S2. Sectoral NO<sub>x</sub> emissions from MEIC inventory in 2019 (0.25°×0.25°).**

5. From Line 114, “... while the CO<sub>2</sub> EFs are assumed to remain unchanged”. If the emissions of NO<sub>2</sub>, NO<sub>x</sub>, and CO<sub>2</sub> are linked (Lines 38-40) what is the logic behind the assumption that CO<sub>2</sub> EFs remain unchanged? Should a scaling factor not be applied as well? This is not well explained.

145

### Response:

The co-emission of CO<sub>2</sub> and NO<sub>x</sub> does not imply aligned trends in their emission factors (EFs). NO<sub>x</sub> EFs have consistently declined due to targeted end-of-pipe controls, with research documenting a continuous decrease in NO<sub>x</sub> emissions in China since 2012, supporting this downward trend in NO<sub>x</sub> EFs. In contrast, CO<sub>2</sub> EFs are primarily influenced by fuel type and combustion conditions, which have remained stable over time. We have added explanations in Lines 135-139 in Manuscript and Text S1 in SI.

150

Lines 135-139: “The CO<sub>2</sub>-to-NO<sub>x</sub> emission ratios in 2022 are updated by reducing NO<sub>x</sub> emission factors (EFs) while keeping CO<sub>2</sub> EFs unchanged based on 2019 MEIC. The default assumption that the reduction rate halves annually is due to the limited potential for further reductions. In contrast, the CO<sub>2</sub> EFs are assumed to remain unchanged, as

155

they are primarily determined by fuel type and combustion conditions (Cheng et al., 2021) (details seen in Text S2).”

### **Text S1. Bottom-up estimates**

160 To derive a sector-specific prior, we update the 2019 Multi-resolution Emission  
Inventory for China (MEIC) (Zheng et al., 2018) using a range of activity data. The  
bottom-up estimation follows two primary steps: first, we apply monthly updates based  
on year-on-year national activity ratios obtained from the National Bureau of Statistics  
(<https://data.stats.gov.cn/english/easyquery.htm?cn=C01>); second, we disaggregate  
165 monthly emissions into daily estimates using multi-source data. The specific data  
sources used in this bottom-up approach are detailed in Table S1.

For emission factors (EFs), we assume a yearly halving of the reduction rate in NO<sub>x</sub>  
EFs. Since 2012, NO<sub>x</sub> emissions have sharply decreased due to effective pollution  
control measures with many end-of-pipe devices; however, the rate of decline has  
170 slowed in recent years, reflecting the diminishing potential for further reductions (Geng  
et al., 2024; Li et al., 2023). As such, the default assumption is that the reduction rate  
in NO<sub>x</sub> EFs halves each year, consistent with the limited potential for continued  
reductions. By contrast, CO<sub>2</sub> EFs are assumed to remain constant over time, as they are  
primarily influenced by fuel type and combustion conditions (Cheng et al., 2021).

175

6. In Lines 88-89: “assuming that each grid’s emission variability was primarily driven  
by its dominant source sectors (contributing over 50%)...”. What about situations  
where no sectors make up more than 50% of a grid cell? Hypothetically, what if Power,  
Industry, Residential, and Transport all made up 25% of a grid cell? Do these situations  
180 not exist in the prior emission inventory? If not, why not? How is an observation-driven  
posterior estimate assigned to a grid cell when it doesn’t meet the criteria?

### **Response:**

For grids without a sector contributing over 50%, we excluded them from sectoral  
scaling factor calculations, instead applying scaling factors derived from grids meeting  
185 this criterion. Notably, over 80% of the grids have a sector contributing more than 50%,  
indicating a clear dominant sector for the majority of grids.

The overall NO<sub>x</sub> emissions remain unaffected by this threshold parameter, as they are  
determined prior to disaggregation into sectors (Eq. 1). The threshold mainly impacts  
the sectoral distribution and the CO<sub>2</sub> emissions conversion process. We assessed the  
190 threshold's effect by adjusting it to 40% and 60% (thre\_40% and thre\_60%), and the  
results show that only residential emissions exhibit sensitivity due to their relatively  
low share of total emissions (Fig. 4 and Fig. S13).

We have added this explanation in Lines 123-126 in Manuscript.

195 Lines 123-126: “For grids without a sector contributing over 50%, we excluded them  
from sectoral scaling factor calculations, instead applying scaling factors derived from  
grids meeting this criterion. The number of these grids accounts for less than 20% of  
total grids, making their impact negligible.”

### **Minor Comment**

200 7. For readers who are not familiar with the mass balance inversion method, providing  
an additional citation, or explicitly pointing the reader to an additional resource, would  
be more helpful than simply citing Zheng et al., 2020 and Li et al., 2023. Pointing the  
readers to a paper such as Mun et al., 2023 or something similar will help make the  
connection between the inversion system being discussed and the corresponding  
205 equations 1-4.

(Mun: <https://www.sciencedirect.com/science/article/pii/S1352231022004940>)

**Response:**

We have added some introduction to the mass balance method in Lines 48-50 in the  
Introduction.

210 Lines 48-50: “This short lifespan of NO<sub>2</sub> facilitates mass-balance approaches for  
estimating NO<sub>x</sub> emissions, which rely on the assumption of a linear relationship  
between NO<sub>2</sub> columns and local NO<sub>x</sub> emissions (Cooper et al., 2017; Mun et al., 2023;  
Martin et al., 2003).”

215 8. Remove the word “here” in Line 59.

**Response:**

We have removed “here” in Line 69 (original 59) as suggested.

9. Add “of” in Line 77. “ten-day moving average of anthropogenic NO<sub>x</sub> and CO<sub>2</sub>”

220 **Response:**

We have added “of” in Line 89 (original 77) as suggested.

10. I understand the need to be succinct in Lines 78-81 regarding the scaling of emission  
sectors; however, it is my opinion that a little more information should be included here.  
225 The authors should consider including an extra statement explaining where these  
indicators came from. Were they from external an external inventory? Where they part  
of MEIC? Does MEIC contain sector-specific information already?

**Response:**

230 We have added more details regarding the bottom-up estimates in Text S1, along with  
Table S1 in SI, which outlines the data sources for activity levels.

**Text S1. Bottom-up estimates**

To derive a sector-specific prior, we update the 2019 Multi-resolution Emission  
Inventory for China (MEIC) (Zheng et al., 2018) using a range of activity data. The  
bottom-up estimation follows two primary steps: first, we apply monthly updates based  
235 on year-on-year national activity ratios obtained from the National Bureau of Statistics  
(<https://data.stats.gov.cn/english/easyquery.htm?cn=C01>); second, we disaggregate  
monthly emissions into daily estimates using multi-source data. The specific data  
sources used in this bottom-up approach are detailed in Table S1.

240 For emission factors (EFs), we assume a yearly halving of the reduction rate in NO<sub>x</sub>  
 EFs. Since 2012, NO<sub>x</sub> emissions have sharply decreased due to effective pollution  
 control measures with many end-of-pipe devices; however, the rate of decline has  
 slowed in recent years, reflecting the diminishing potential for further reductions (Geng  
 et al., 2024; Li et al., 2023). As such, the default assumption is that the reduction rate  
 245 in NO<sub>x</sub> EFs halves each year, consistent with the limited potential for continued  
 reductions. By contrast, CO<sub>2</sub> EFs are assumed to remain constant over time, as they are  
 primarily influenced by fuel type and combustion conditions (Cheng et al., 2021).

**Table S1. Data sources used in the bottom-up estimates.**

| Steps                                   | Corresponding MEIC sector           | Adopted data                           | Data source                                                                                                                                                      |
|-----------------------------------------|-------------------------------------|----------------------------------------|------------------------------------------------------------------------------------------------------------------------------------------------------------------|
| Monthly emission estimation*            | Power                               | Thermal power generation               | National Bureau of Statistics<br>( <a href="https://data.stats.gov.cn/english/easyquery.htm?cn=C01">https://data.stats.gov.cn/english/easyquery.htm?cn=C01</a> ) |
|                                         | Cement                              | Cement production                      |                                                                                                                                                                  |
|                                         | Iron                                | Iron production                        |                                                                                                                                                                  |
|                                         | Other industry                      | Manufacturing value added              |                                                                                                                                                                  |
|                                         | On-road                             | Road Freight turnover                  |                                                                                                                                                                  |
|                                         | Off-road                            | Construction area                      |                                                                                                                                                                  |
| Dissolving monthly emissions into daily | Residential/<br>Residential-bio     | Population-weighted heating degree day | Calculation based on the 2m temperature data from the ERA5 dataset                                                                                               |
|                                         | Power/<br>Cement/<br>Other industry | Coal consumption                       | (Wu et al., 2022)                                                                                                                                                |
|                                         | Iron                                | Operating rates of electric furnace    | The custeel database<br>( <a href="https://www.custeel.com/">https://www.custeel.com/</a> )                                                                      |
|                                         | On-road/<br>Off-road                | Baidu migration data                   | The Baidu database<br>( <a href="https://qianxi.baidu.com/">https://qianxi.baidu.com/</a> )                                                                      |

\*Production index are used to differentiate January and February from the combined first two months' data in the National Bureau of Statistics.

250

11. The source of the 40% reduction is confusing (Lines 105-106). Only after reading the rest of the paper did I realize that this was from one of the sensitivity tests. (Again, the authors need to focus on the logical flow of information in the text.)

**Response:**

255

The 40% reduction in simulation is used to quantify the response of NO<sub>2</sub> concentration to the changes in anthropogenic NO<sub>x</sub> emission ( $\beta$ ), building on previous works. In our previous tests, this perturbation magnitude seems to have a limited impact on final estimates within the tested range of 30-50%. We have added a brief explanation in Lines 110-112 in Manuscript. Besides, we have made adjustments in Methods to clarify the logical flow, please refer to the response to Comment 4.

260

Lines 110-112: “The 40% reduction was selected after a series of sensitivity tests, which

demonstrated that this perturbation level exerts a limited impact on the  $\beta$  estimates (Zheng et al., 2020).”

12. Section 2.2.1 does not mention the spatial resolution of the inventory.

265 **Response:**

The original MEIC inventory has a resolution of  $0.25^\circ \times 0.25^\circ$ , which we aggregate to  $0.5^\circ \times 0.625^\circ$  to align with the resolution of the prior and the GEOS-Chem model. We have added this explanation in Lines 94-96 and Lines 165-166.

270 Lines 94-96: “Notably, to reconcile the resolution between the prior emissions and the model, we aggregated the original MEIC emissions from a resolution of  $0.25^\circ \times 0.25^\circ$  (Fig. S2) to  $0.5^\circ \times 0.625^\circ$ .”

Lines 165-166: “The prior provides the sectoral profile for subsequent emission attribution. We conducted a comprehensive examination of associated parameters when updating the prior from 2019 MEIC ( $0.5^\circ \times 0.625^\circ$ ),”

275

13. In Line 172, consider changing “policies” to “protocols”. The use of “policies” has political connotations.

**Response:**

We have changed the “policies” to “protocols” in Line 206 (original 172) as suggested.

280

14. In Line 245, add “the” before “tests’ impact”.

**Response:**

We have added “the” in Line 278 (original 245) as suggested.

285 15. From Line 252, “A reduction in  $\text{NO}_x$  increases  $r\text{NO}_x$ ”. Why is this the case? I do not follow.

**Response:**

290  $r\text{NO}_x$  represents the reduction ratio of  $\text{NO}_x$  emission factors (EFs); thus, a greater reduction in  $\text{NO}_x$  EFs corresponds to a higher  $r\text{NO}_x$  value. We have explained this parameter in Line 143.

Line 143: “ $r\text{NO}_{x,s,i,y}$  is the reduction ratio in  $\text{NO}_x$  EFs by sector from 2019 to 2022 derived from the bottom-up estimation.”

16. In Line 273, I think “parameters” should be singular: “parameter”.

295 **Response:**

We have corrected the “parameters” to “parameter” in Line 306 (original 273) as suggested.



17. In Line 307, “mode” should be “model”.

300 **Response:**

We have changed the “mode” to “model” in Line 340 (original 307) as suggested.

18. How are the cities arranged in Figure 5? Are they arranged by longitude?

**Response:**

305 The original arrangement was based on the IDs of China's provinces. We have now modified it to follow an area-based sequence, as the area is one of the key factors influencing regional emission estimates in this methodology.

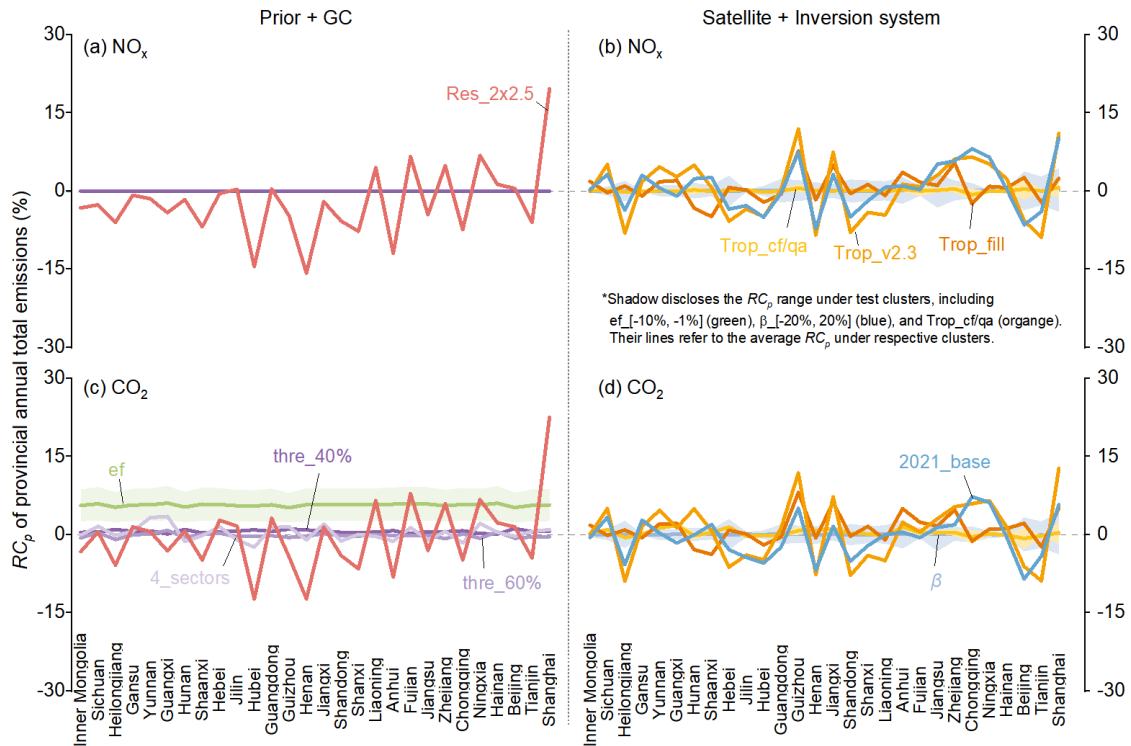

310 **Figure 5. Response of provincial annual total NO<sub>x</sub> and CO<sub>2</sub> emissions to different tests.** (a) and (b) show  $RC_p$  of NO<sub>x</sub> emissions incurred by tests. (c) and (d) are plotted for CO<sub>2</sub> emission as (a) and (b). Lines refer to the  $RC_p$  caused by the corresponding test or the averaged  $RC_p$  caused by corresponding test clusters (ef\_[-10%, -1%] and  $\beta$ [-20, 20%]), and the shadow refers to the  $RC_p$  range in test clusters. Only provinces with enough TROPOMI observations are shown here (i.e., grids with NO<sub>2</sub> TVCDs larger than  $1 \times 10^{15}$  molecules/cm<sup>2</sup> cover more than 90% of anthropogenic NO<sub>x</sub> emissions within provinces). The provinces are arranged by area.

315

## Reference:

- 320 Cheng, J., Tong, D., Liu, Y., Bo, Y., Zheng, B., Geng, G., He, K., and Zhang, Q.: Air quality and health benefits of China's current and upcoming clean air policies, *Faraday Discussions*, 226, 584-606, <https://doi.org/10.1039/D0FD00090F>, 2021.
- Cooper, M., Martin, R. V., Padmanabhan, A., and Henze, D. K.: Comparing mass balance and adjoint methods for inverse modeling of nitrogen dioxide columns for global nitrogen oxide emissions, *Journal of Geophysical Research: Atmospheres*, 122, 4718-4734, <https://doi.org/10.1002/2016JD025985>, 2017.
- 325 Cooper, M. J., Martin, R. V., Hammer, M. S., Levelt, P. F., Veefkind, P., Lamsal, L. N., Krotkov, N. A., Brook, J. R., and McLinden, C. A.: Global fine-scale changes in ambient NO<sub>2</sub> during COVID-19 lockdowns, *Nature*, 601, 380-387, <https://doi.org/10.1038/s41586-021-04229-0>, 2022.
- Geng, G., Liu, Y., Liu, Y., Liu, S., Cheng, J., Yan, L., Wu, N., Hu, H., Tong, D., Zheng, B., Yin, Z., He, K., and Zhang, Q.: Efficacy of China's clean air actions to tackle PM<sub>2.5</sub> pollution between 2013 and 2020, *Nature Geoscience*, 17, 987-994, 10.1038/s41561-024-01540-z, 2024.
- 330 Li, H. and Zheng, B.: Toward monitoring daily anthropogenic CO<sub>2</sub> emissions with air pollution sensors from space, *One Earth*, 7, 1846-1857, 10.1016/j.oneear.2024.08.019, 2024.
- Li, S., Wang, S., Wu, Q., Zhang, Y., Ouyang, D., Zheng, H., Han, L., Qiu, X., Wen, Y., Liu, M., Jiang, Y., Yin, D., Liu, K., Zhao, B., Zhang, S., Wu, Y., and Hao, J.: Emission trends of air pollutants and CO<sub>2</sub> in China from 2005 to 2021, *Earth Syst. Sci. Data*, 15, 2279-2294, <https://doi.org/10.5194/essd-15-2279-2023>, 2023.
- 335 MacDonald, C. G., Mastrogiacomo, J. P., Laughner, J. L., Hedelius, J. K., Nassar, R., and Wunch, D.: Estimating enhancement ratios of nitrogen dioxide, carbon monoxide and carbon dioxide using satellite observations, *Atmos. Chem. Phys.*, 23, 3493-3516, <https://doi.org/10.5194/acp-23-3493-2023>, 2023.
- Martin, R. V., Jacob, D. J., Chance, K., Kurosu, T. P., Palmer, P. I., and Evans, M. J.: Global inventory of nitrogen oxide emissions constrained by space-based observations of NO<sub>2</sub> columns, *Journal of Geophysical Research: Atmospheres*, 108, <https://doi.org/10.1029/2003JD003453>, 2003.
- 340 Mun, J., Choi, Y., Jeon, W., Lee, H. W., Kim, C.-H., Park, S.-Y., Bak, J., Jung, J., Oh, I., Park, J., and Kim, D.: Assessing mass balance-based inverse modeling methods via a pseudo-observation test to constrain NO<sub>x</sub> emissions over South Korea, *Atmospheric Environment*, 292, 119429, <https://doi.org/10.1016/j.atmosenv.2022.119429>, 2023.
- Roten, D., Lin, J. C., Das, S., and Kort, E. A.: Constraining Sector-Specific CO<sub>2</sub> Fluxes Using Space-Based XCO<sub>2</sub> Observations Over the Los Angeles Basin, *Geophysical Research Letters*, 50, e2023GL104376, <https://doi.org/10.1029/2023GL104376>, 2023.
- 350 Taylor, T. E., O'Dell, C. W., Baker, D., Bruegge, C., Chang, A., Chapsky, L., Chatterjee, A., Cheng, C., Chevallier, F., Crisp, D., Dang, L., Drouin, B., Eldering, A., Feng, L., Fisher, B., Fu, D., Gunson, M., Haemmerle, V., Keller, G. R., Kiel, M., Kuai, L., Kurosu, T., Lambert, A., Laughner, J., Lee, R., Liu, J., Mandrake, L., Marchetti, Y., McGarragh, G., Merrelli, A., Nelson, R. R., Osterman, G., Oyafuso, F., Palmer, P. I., Payne, V. H., Rosenberg, R., Somkuti, P., Spiers, G., To, C., Weir, B., Wennberg, P. O., Yu, S., and Zong, J.: Evaluating the consistency between OCO-2 and OCO-3 XCO<sub>2</sub> estimates derived from the NASA ACOS version 10 retrieval algorithm, *Atmos. Meas. Tech.*, 16, 3173-3209, 10.5194/amt-16-3173-2023, 2023.
- 355 Wu, N., Geng, G., Qin, X., Tong, D., Zheng, Y., Lei, Y., and Zhang, Q.: Daily Emission Patterns of Coal-Fired Power Plants in China Based on Multisource Data Fusion, *ACS Environmental Au*, <https://doi.org/10.1021/acsenvironau.2c00014>, 2022.
- 360 Yang, E. G., Kort, E. A., Wu, D., Lin, J. C., Oda, T., Ye, X., and Lauvaux, T.: Using Space-Based

- Observations and Lagrangian Modeling to Evaluate Urban Carbon Dioxide Emissions in the Middle East, *Journal of Geophysical Research: Atmospheres*, 125, e2019JD031922, <https://doi.org/10.1029/2019JD031922>, 2020.
- 365 Ye, C., Zhou, X., Pu, D., Stutz, J., Festa, J., Spolaor, M., Tsai, C., Cantrell, C., Mauldin, R. L., Campos, T., Weinheimer, A., Hornbrook, R. S., Apel, E. C., Guenther, A., Kaser, L., Yuan, B., Karl, T., Haggerty, J., Hall, S., Ullmann, K., Smith, J. N., Ortega, J., and Knote, C.: Rapid cycling of reactive nitrogen in the marine boundary layer, *Nature*, 532, 489-491, 10.1038/nature17195, 2016.
- 370 Ye, X., Lauvaux, T., Kort, E. A., Oda, T., Feng, S., Lin, J. C., Yang, E. G., and Wu, D.: Constraining Fossil Fuel CO<sub>2</sub> Emissions From Urban Area Using OCO-2 Observations of Total Column CO<sub>2</sub>, *Journal of Geophysical Research: Atmospheres*, 125, e2019JD030528, <https://doi.org/10.1029/2019JD030528>, 2020.
- 375 Zheng, B., Geng, G., Ciais, P., Davis, S. J., Martin, R. V., Meng, J., Wu, N., Chevallier, F., Broquet, G., Boersma, F., van der A, R., Lin, J., Guan, D., Lei, Y., He, K., and Zhang, Q.: Satellite-based estimates of decline and rebound in China's CO<sub>2</sub> emissions during COVID-19 pandemic, *Science Advances*, 6, eabd4998, <https://doi.org/10.1126/sciadv.abd4998>, 2020.
- 380 Zheng, B., Tong, D., Li, M., Liu, F., Hong, C., Geng, G., Li, H., Li, X., Peng, L., Qi, J., Yan, L., Zhang, Y., Zhao, H., Zheng, Y., He, K., and Zhang, Q.: Trends in China's anthropogenic emissions since 2010 as the consequence of clean air actions, *Atmos. Chem. Phys.*, 18, 14095-14111, 10.5194/acp-18-14095-2018, 2018.
